# Supplementary material
Source: publisher figshare collection journal article supplement (https://springernature.figshare.com/articles/dataset/_/11907768)
Supplement: Supplementary file 1 [file 1]

## Sheet: Sheet1
Figure/Table/Supplementary figure/Supplementary Table supported by the dataset	Name of dataset	Dataset format	Location of dataset	Link to dataset
Figure 2	Histology images_F2.jpg	.jpg	npj Breast Cancer figshare repository	https://doi.org/10.6084/m9.figshare.11907768
Figure 3	TILS_ringstudy1.csv, TILS_ringstudy2.csv, TILS_ringstudy3.csv	.csv	Institutional file storage (not publicly available)	N/A
Figure 4	Histology images_F4.tif	.tif	npj Breast Cancer figshare repository	https://doi.org/10.6084/m9.figshare.11907768
Figure 5	Histology images_F5.tif	.tif	npj Breast Cancer figshare repository	https://doi.org/10.6084/m9.figshare.11907768
Figure 6	Histology images_F6.tif	.tif	npj Breast Cancer figshare repository	https://doi.org/10.6084/m9.figshare.11907768
Figure 7	Histology images_F7.tif	.tif	npj Breast Cancer figshare repository	https://doi.org/10.6084/m9.figshare.11907768
Figure 8	Histology images_F8.tif	.tif	npj Breast Cancer figshare repository	https://doi.org/10.6084/m9.figshare.11907768
Figure 9	This figure was generated using the publically available prognosis tool at www.tilsinbreastcancer.org/, which utilises datasets from a pooled analysis of 9 phase 3 breast cancer trials (https://doi.org/10.1200/JCO.18.01010)
Table 1	TILS_ringstudy1.csv, TILS_ringstudy2.csv, TILS_ringstudy3.csv	.csv	Institutional file storage (not publicly available)	N/A
Table 2	Generated from glass slides and scanned slides identified by analysis shown in figure 3 (TILS_ringstudy1.csv, TILS_ringstudy2.csv, TILS_ringstudy3.csv; Ring study 1: slide 05.vsf, slide 12.vsf, slide 14.vsf, slide 16.vsf, slide 28.vsf, slide 29.vsf, slide 42.vsf; Ring study 2: slide 15.vsf, slide 28.vsf, slide 29.vsf, slide 39.vsf, slide 41.vsf, slide 54.vsf)	csv (data analysis); vsf (scanned slides; CognitionMaster Professional Suite, VMScope, vmscope.com); glass slides	Institutional file storage (not publicly available)	N/A
Table 3	Generated from glass slides and scanned slides identified by analysis shown in figure 3 (TILS_ringstudy1.csv, TILS_ringstudy2.csv, TILS_ringstudy3.csv; Ring stude 1: slide 05.vsf, slide 12.vsf, slide 14.vsf, slide 16.vsf, slide 28.vsf, slide 29.vsf, slide 42.vsf; Ring study 2: slide 15.vsf, slide 28.vsf, slide 29.vsf, slide 39.vsf, slide 41.vsf, slide 54.vsf)	csv (data analysis); vsf (scanned slides; CognitionMaster Professional Suite, VMScope, vmscope.com); glass slides	Institutional file storage (not publicly available)	N/A
Table 4	Generated from glass slides and scanned slides identified by analysis shown in figure 3 (TILS_ringstudy1.csv, TILS_ringstudy2.csv, TILS_ringstudy3.csv; Ring study 1: slide 05.vsf, slide 12.vsf, slide 14.vsf, slide 16.vsf, slide 28.vsf, slide 29.vsf, slide 42.vsf; Ring study 2: slide 15.vsf, slide 28.vsf, slide 29.vsf, slide 39.vsf, slide 41.vsf, slide 54.vsf)	csv (data analysis); vsf (scanned slides; CognitionMaster Professional Suite, VMScope, vmscope.com); glass slides	Institutional file storage (not publicly available)	N/A
Table 5	Generated from glass slides and scanned slides identified by analysis shown in figure 3 (TILS_ringstudy1.csv, TILS_ringstudy2.csv, TILS_ringstudy3.csv; Ring study 1: slide 05.vsf, slide 12.vsf, slide 14.vsf, slide 16.vsf, slide 28.vsf, slide 29.vsf, slide 42.vsf; Ring study 2: slide 15.vsf, slide 28.vsf, slide 29.vsf, slide 39.vsf, slide 41.vsf, slide 54.vsf)	csv (data analysis); vsf (scanned slides; CognitionMaster Professional Suite, VMScope, vmscope.com); glass slides	Institutional file storage (not publicly available)	N/A
Supplementary table 1	TILS_ringstudy1.csv	.csv	Institutional file storage (not publicly available)	N/A
Supplementary table 2	TILS_ringstudy2.csv	.csv	Institutional file storage (not publicly available)	N/A
Supplementary table 3	TILS_ringstudy3.csv	.csv	Institutional file storage (not publicly available)	N/A
Supplementary figure 1	This figure was generated using the publically available prognosis tool at www.tilsinbreastcancer.org/, which utilises datasets from a pooled analysis of 9 phase 3 breast cancer trials (https://doi.org/10.1200/JCO.18.01010)
Supplementary figure 2	This figure was generated using the publically available prognosis tool at www.tilsinbreastcancer.org/, which utilises datasets from a pooled analysis of 9 phase 3 breast cancer trials (https://doi.org/10.1200/JCO.18.01010)
Supplementary figure 3	This figure was generated using the publically available prognosis tool at www.tilsinbreastcancer.org/, which utilisedsdatasets from a pooled analysis of 9 phase 3 breast cancer trials (https://doi.org/10.1200/JCO.18.01010)
Supplementary figure 4	This figure was generated using the publically available prognosis tool at www.tilsinbreastcancer.org/, which utilises datasets from a pooled analysis of 9 phase 3 breast cancer trials (https://doi.org/10.1200/JCO.18.01010)
Supplementary figure 5	This figure was generated using the publically available prognosis tool at www.tilsinbreastcancer.org/, which utilises datasets from a pooled analysis of 9 phase 3 breast cancer trials (https://doi.org/10.1200/JCO.18.01010)
Supplementary figure 6	This figure was generated using the publically available prognosis tool at www.tilsinbreastcancer.org/, which utilises datasets from a pooled analysis of 9 phase 3 breast cancer trials (https://doi.org/10.1200/JCO.18.01010)
Supplementary figure 7	This figure was generated using the publically available prognosis tool at www.tilsinbreastcancer.org/, which utilises datasets from a pooled analysis of 9 phase 3 breast cancer trials (https://doi.org/10.1200/JCO.18.01010)
Supplementary figure 8	This figure was generated using the publically available prognosis tool at www.tilsinbreastcancer.org/, which utilises datasets from a pooled analysis of 9 phase 3 breast cancer trials (https://doi.org/10.1200/JCO.18.01010)
